# Supplementary material for: Genomic Selection in Multi-environment Crop Trials
Source: PubMed Central journal article supplement (PMC4856083; doi:10.1534/g3.116.027524), 2016-03-11
Supplement: supp_g3.116.027524_FileS1.pdf [file supp_g3.116.027524_FileS1.pdf]

## File S1

### Instructions for analysis

Analysis was performed using R v3.2.0 (R Core Team 2015) using the library ASReml v3.0-1 (Butler *et al.* 2009). To reproduce the analysis using the code provided in the supplementary files the following set up of folders is suggested. It is suggested to create the following **FOLDERS and subfolders** placing the listed supplementary files in them.

**DATA** File S2 'datasetsGenetics.RData'

**CV10**

**sampling** File S3 'cv10sampling.R'

**single site – 2010** File S6 'single site – 2010.R', File S12 'calculate genetic predictions-subset markers AT random single site – 2010.R'

**single site – 2011** File S7 'single site – 2011.R', File S13 'calculate genetic predictions-subset markers AT random single site – 2011.R'

**single site - T10P11** File S8 'single site – T10P11.R', File S14 'calculate genetic predictions-subset markers AT random single site – T10P11.R'

**single site – T11P10** File S9 'single site – T11P10.R', File S15 'calculate genetic predictions-subset markers AT random single site – T11P10.R'

**met model -CS +DIAG** File S10 'met model CS+DIAG.R', File S16 'calculate genetic predictions-subset markers AT random CS+DIAG.R'

**met model -FAM1** File S11 'met model -FAM1.R', File S17 'calculate genetic predictions-subset markers AT random FAM1.R'

For analysis start with running the scripts in the **sampling** subfolder, then proceed with other folders.

Folders **CV20** and **CV40** and the corresponding subfolders can also be created with the following differences

- a. the R scripts copied to the '**sampling**' subfolders will be File S4 and File S5 for CV20 and CV40 respectively and need no further alteration
- b. the R script for Files S12-S17 are not required in CV20 and CV40
- c. the other scripts Files S6-S11 that are supplied are set up to run CV10 and some minor modifications to Files S6-S11 of CV20 and CV40 are therefore necessary. The changes required are identified within the R scripts but are also documented below

Changes to the Files S6-S11 for CV20 and CV40

Within the SIM section of the R code

- i. For CV20 replace `s<-10` with `s<-45`
- ii. For CV40 replace `s<-10` with `s<-210`
- iii. place # in front of (or) delete line  
`#eval(parse(file="calculate genetic predictions-subset markers AT random CS+DIAG.R"))`

It is not necessary to run the code under the EXPORT section as this is used to create Figures 2 and 3 from CV10 results only

## Files S2-S19

Available for download at [www.g3journal.org/lookup/suppl/doi:10.1534/g3.116.027524 /-/DC1](http://www.g3journal.org/lookup/suppl/doi:10.1534/g3.116.027524/-/DC1)

**File S2** 'datasetsGenetics.RData' contains the phenotypic and genotypic data in R data format

**File S3** 'cv10sampling.R' is the R script for loading data set, the random division of the data and group combinations covering the 10 iterations for CV10

**File S4** 'cv20sampling.R' is the R script for loading data set, the random division of the data and group combinations covering the 45 iterations for CV20

**File S5** 'cv40sampling.R' is the R script for loading data set, the random division of the data and group combinations covering the 210 iterations for CV40

**Files S6-S11:** Main R scripts for conducting the cross validation with each of the analysis. The scripts are customised for CV10. For CV20 and CV40 necessary amendments are documented in S1

**File S6** 'single site – 2010.R' is the R script to produce results of comparison 1 (Table 6 and Table 7)

**File S7** 'single site – 2011.R' is the R script to produce results of comparison 3 (Table 6 and Table 7)

**File S8** 'single site – T10P11.R' is the R script to produce results of comparison 4 (Table 6 and Table 7)

**File S9** 'single site – T11P10.R' is the R script to produce results of comparison 2 (Table 6 and Table 7)

**File S10** 'met model CS+DIAG.R' is the R script to produce results of comparison 5, 6, 9, 10 (Table 6 and Table 7)

**File S11** 'met model -FAM1.R' is the R script to produce results of comparison 7, 8, 11, 12 (Table 6 and Table 7)

**File S12-S17** R code for the MAS approach where a subset of random markers and their effects were used to predict GEBV. This was performed for CV10 only.

**File S12** 'calculate genetic predictions-subset markers AT random single site – 2010.R' is the R script for the MAS approach to support the results of comparison 1 (Table 6 and 7)

**File S13** 'calculate genetic predictions-subset markers AT random single site – 2011.R' is the R script for the MAS approach to support the results of comparison 3 (Table 6 and 7)

**File S14** 'calculate genetic predictions-subset markers AT random single site – T10P11.R' is the R script for the MAS approach to support the results of comparison 4 (Table 6 and 7)

**File S15** 'calculate genetic predictions-subset markers AT random single site – T11P10.R' is the R script for the MAS approach to support the results of comparison 2 (Table 6 and 7)

**File S16** 'calculate genetic predictions-subset markers AT random CS+DIAG.R' is the R script for the MAS approach to support the results of comparison 5, 6, 9, 10 (Table 6 and 7)

**File S17** 'calculate genetic predictions-subset markers AT random FAM1.R' is the R script for the MAS approach to support the results of comparison 7, 8, 11, 12 (Table 6 and 7)

**File S18** 'Figures 2 and 3.R' is the R script for producing Figure 2 and 3

**File S19** 'Figure 1 Tables 4 and 5.R' is the R script for producing Figure 1 and results in Tables 4 and 5, the heritability and the proportion of variation accounted for by the markers
